# Supplementary material for: Syntheses of three members of A(II)M(IV)(PO4)2: luminescence properties of PbGe(PO4)2 and its Eu3+-doped powders
Source: Royal Society of Chemistry journal article supplement (doi:10.1039/c3ce40936h), 2013-01-01

## Syntheses of three members of $A^{(II)}M^{(IV)}(PO_4)_2$ : Luminescence

### Properties of $PbGe(PO_4)_2$ and Its $Eu^{3+}$ -doped Powders

Wei-Long Zhang<sup>a</sup>, Chen-Sheng, Lin<sup>a</sup>, Zhang-Zhen He<sup>a</sup>, Hao Zhang<sup>a</sup>, Zhong-Zhen, Luo<sup>a</sup>, and Wen-Dan Cheng<sup>a\*</sup>

<sup>a</sup> State Key Laboratory of Structural Chemistry, Fujian Institute of Research on the Structure of Matter, Chinese

Academy of Sciences, Fuzhou 350002, P. R. China

#### Electronic Supplementary Information (ESI)

**Table S1** Crystal data and structural refinements for  $PbGe(PO_4)_2$ ,  $SrGe(PO_4)_2$ , and  $PbTi(PO_4)_2$

| Chemical formula                        | $PbGe(PO_4)_2$ | $SrGe(PO_4)_2$ | $PbTi(PO_4)_2$ |
|-----------------------------------------|----------------|----------------|----------------|
| Formula weight                          | 469.75         | 469.75         | 445.01         |
| Crystal system                          | Monoclinic,    | Monoclinic,    | Monoclinic,    |
| Space group                             | C2/c (No. 62)  | C2/c (No. 62)  | C2/c (No. 62)  |
| a (Å)                                   | 16.48(3)       | 16.170(13)     | 16.683(11)     |
| b (Å)                                   | 5.068(8)       | 5.065(4)       | 5.171(3)       |
| c (Å)                                   | 7.963(14)      | 7.869(7)       | 8.229(5)       |
| $\beta$ (°)                             | 114.92(3)      | 115.072(13)    | 116.155(7)     |
| V (Å <sup>3</sup> )                     | 603.2(18)      | 583.8(8)       | 637.3(7)       |
| Z                                       | 4              | 4              | 4              |
| D <sub>calcd</sub> (g/cm <sup>3</sup> ) | 5.173          | 3.984          | 4.639          |
| $\mu$ (Mo K $\alpha$ )/mm <sup>-1</sup> | 33.395         | 33.395         | 28.148         |
| Reflections collected                   | 2149           | 2149           | 2214           |
| Completeness to theta                   | 100.0 %        | 99.6 %         | 97.0 %         |
| Reflections ( $I > 2\sigma(I)$ )        | 682            | 665            | 711            |
| T (K)                                   | 293            | 293            | 293            |
| GOF on F <sup>2</sup>                   | 1.055          | 1.136          | 1.026          |
| R1, wR2 [ $I > 2\sigma(I)$ ]            | 0.0383, 0.0980 | 0.0238, 0.0578 | 0.0448, 0.1067 |
| R1, wR2 (all data)                      | 0.0397, 0.0994 | 0.0246, 0.0582 | 0.0496, 0.1094 |

$$R1 = \sum ||Fo| - |Fc|| / \sum |Fo|, wR2 = \{ \sum w[(Fo)^2 - (Fc)^2]^2 / \sum w[(Fo)^2]^2 \}^{1/2}$$

**Table S2** Atomic coordinates ( $\times 10^4$ ) and displacement parameters ( $\text{\AA}^2 \times 10^3$ ) for  $\text{PbGe}(\text{PO}_4)_2$ ,  $\text{SrGe}(\text{PO}_4)_2$  and  $\text{PbTi}(\text{PO}_4)_2$ .

| Atom                                    | x        | y         | z        | $U_{eq}^a$ |
|-----------------------------------------|----------|-----------|----------|------------|
| <b>PbGe(PO<sub>4</sub>)<sub>2</sub></b> |          |           |          |            |
| Pb(1)                                   | 0        | 6847(1)   | 2500     | 18(1)      |
| Ge(1)                                   | 2500     | 2500      | 0        | 7(1)       |
| P(1)                                    | 1490(2)  | 2405(5)   | 2646(3)  | 8(1)       |
| O(1)                                    | 2231(5)  | 2318(15)  | 1997(9)  | 10(1)      |
| O(2)                                    | 1685(4)  | 4680(14)  | 4095(9)  | 11(1)      |
| O(3)                                    | 1524(4)  | 9750(13)  | 3669(9)  | 10(1)      |
| O(4)                                    | 552(5)   | 2805(15)  | 1176(10) | 14(1)      |
| <b>SrGe(PO<sub>4</sub>)<sub>2</sub></b> |          |           |          |            |
| Sr(1)                                   | 0        | 2140(1)   | 2500     | 11(1)      |
| Ge(1)                                   | 2500     | 2500      | 5000     | 5(1)       |
| P(1)                                    | 1471(1)  | -2566(1)  | 2636(1)  | 5(1)       |
| O(1)                                    | 521(2)   | -2329(4)  | 1106(3)  | 12(1)      |
| O(2)                                    | 1626(1)  | -213(4)   | 4002(3)  | 8(1)       |
| O(3)                                    | 3477(1)  | 159(4)    | 6261(3)  | 9(1)       |
| O(4)                                    | 2253(2)  | 2617(3)   | 7049(3)  | 8(1)       |
| <b>PbTi(PO<sub>4</sub>)<sub>2</sub></b> |          |           |          |            |
| Pb(1)                                   | 0        | 1744(2)   | 2500     | 21(1)      |
| Ti(2)                                   | -2500    | -2500     | 5000     | 7(1)       |
| P(1)                                    | -1438(2) | -2616(6)  | 2418(4)  | 7(1)       |
| O(1)                                    | -1675(5) | -408(17)  | 1006(11) | 12(2)      |
| O(2)                                    | 1486(5)  | 4768(17)  | 3529(11) | 11(2)      |
| O(3)                                    | -502(5)  | -2110(19) | 3870(11) | 16(2)      |
| O(4)                                    | -2145(5) | -2667(18) | 3132(12) | 12(2)      |
|                                         |          |           |          |            |

$U_{eq}$  is defined as one-third of the trace of the orthogonalized  $U_{ij}$  tensor

**Table S3** Selected bond lengths ( $\text{\AA}$ ) and angles [deg] for  $\text{PbGe}(\text{PO}_4)_2$ ,  $\text{SrGe}(\text{PO}_4)_2$  and  $\text{PbTi}(\text{PO}_4)_2$ .

| <b>PbGe(PO<sub>4</sub>)<sub>2</sub></b> |          |          |          |          |          |
|-----------------------------------------|----------|----------|----------|----------|----------|
| Pb1-O4                                  | 2.635(8) | Pb1-O4#1 | 2.635(8) | Pb1-O4#2 | 2.680(9) |
| Pb1-O4#3                                | 2.680(9) | Pb1-O3   | 2.715(7) | Pb1-O3#1 | 2.715(7) |
| Pb1-O2#1                                | 2.749(8) | Pb1-O2   | 2.749(8) |          |          |
| Ge1-O1#5                                | 1.825(7) | Ge1-O1   | 1.825(7) | Ge1-O2#6 | 1.885(7) |
| Ge1-O2#7                                | 1.885(7) | Ge1-O3#6 | 1.890(7) | Ge1-O3#7 | 1.890(7) |

|                                     |          |          |          |          |          |
|-------------------------------------|----------|----------|----------|----------|----------|
| P1-O4                               | 1.510(8) | P1-O1    | 1.513(8) | P1-O3#8  | 1.562(7) |
| P1-O2                               | 1.566(7) |          |          |          |          |
| SrGe(PO <sub>4</sub> ) <sub>2</sub> |          |          |          |          |          |
| Sr1-O1#1                            | 2.597(3) | Sr1-O1#2 | 2.597(3) | Sr1-O3#3 | 2.618(3) |
| Sr1-O3#4                            | 2.618(3) | Sr1-O2#5 | 2.664(3) | Sr1-O2   | 2.664(3) |
| Sr1-O1#5                            | 2.797(3) | Sr1-O1   | 2.797(3) | Sr1-O1#6 | 3.247(3) |
| Sr1-O1#7                            | 3.247(3) |          |          |          |          |
| Ge1-O4#3                            | 1.819(3) | Ge1-O4   | 1.819(3) | Ge1-O3   | 1.886(2) |
| Ge1-O3#3                            | 1.886(2) | Ge1-O2   | 1.887(2) | Ge1-O2#3 | 1.887(2) |
| P1-O1                               | 1.501(2) | P1-O4#8  | 1.520(3) | P1-O2    | 1.552(2) |
| P1-O3#9                             | 1.556(2) |          |          |          |          |
| PbTi(PO <sub>4</sub> ) <sub>2</sub> |          |          |          |          |          |
| Pb1-O3#1                            | 2.603(9) | Pb1-O3   | 2.603(9) | Pb1-O3#2 | 2.731(9) |
| Pb1-O3#3                            | 2.731(9) | Pb1-O2   | 2.731(9) | Pb1-O2#1 | 2.731(9) |
| Pb1-O1)                             | 2.744(8) | Pb1-O1#1 | 2.744(8) |          |          |
| Ti2-O4)#4                           | 1.877(9) | Ti2-O4   | 1.877(9) | Ti2-O1#5 | 1.958(8) |
| Ti2-O1)#6                           | 1.958(8) | Ti2-O2#7 | 1.974(8) | Ti2-O2#2 | 1.974(8) |
| P1-O3)                              | 1.514(8) | P1-O4    | 1.532(9) | P1-O2#8  | 1.546(9) |
| P1-O1                               | 1.551(9) |          |          |          |          |

Symmetry transformations used to generate equivalent atoms:

For PbGe(PO<sub>4</sub>)<sub>2</sub>: #1 -x,y,-z+1/2; #2 x,-y+1,z+1/2; #3 -x,-y+1,-z; #4 -x,-y+1,-z+1; #5 -x+1/2,-y+1/2,-z; #6 x,-y+1,z-1/2; #7 -x+1/2,y-1/2,-z+1/2; #8 x,y-1,z; #9 -x+1/2,y+1/2,-z+1/2; #10 x,y+1,z;

For SrGe(PO<sub>4</sub>)<sub>2</sub> : #1 x,-y,z+1/2; #2 -x,-y,-z; #3 -x+1/2,-y+1/2,-z+1; #4 x-1/2,-y+1/2,z-1/2; #5 -x,y,-z+1/2; #6 -x,y+1,-z+1/2; #7 x,y+1,z; #8 x,-y,z-1/2; #9 -x+1/2,-y-1/2,-z+1; #10 x,y-1,z;

For PbTi(PO<sub>4</sub>)<sub>2</sub>: #1 -x,y,-z+1/2; #2 -x,-y,-z+1; #3 x,-y,z-1/2; #4 -x-1/2,-y-1/2,-z+1; #5 -x-1/2,y-1/2,-z+1/2; #6 x,-y,z+1/2; #7 x-1/2,y-1/2,z; #8 -x,y-1,-z+1/2; #9 -x-1/2,y+1/2,-z+1/2; #10 -x,y+1,-z+1/2; #11 x+1/2,y+1/2,z;

**Table S4** CIE Chromaticity Coordinates of Pb<sub>1-x</sub>Eu<sub>x</sub>Ge(PO<sub>4</sub>)<sub>2</sub>

| Pb <sub>1-x</sub> Eu <sub>x</sub> Ge(PO <sub>4</sub> ) <sub>2</sub> | λ <sub>ex</sub> (nm) | λ <sub>em</sub> (nm)                       | CIE         |
|---------------------------------------------------------------------|----------------------|--------------------------------------------|-------------|
| X=0                                                                 | 265 nm               | Em <sub>base</sub> = broad-band(350-700)   | (0.23,0.40) |
| X=0.02                                                              | 265 nm               | Em <sub>base</sub> , 594, 612, 653 and 700 | (0.22,0.36) |
| X=0.04                                                              | 265 nm               | Em <sub>base</sub> , 594, 612, 653 and 700 | (0.31,0.36) |
| X=0.06                                                              | 265 nm               | Em <sub>base</sub> , 594, 612, 653 and 700 | (0.35,0.36) |
| X=0.07                                                              | 265 nm               | Em <sub>base</sub> , 594, 612, 653 and 700 | (0.37,0.37) |
| X=0.08                                                              | 265 nm               | Em <sub>base</sub> , 594, 612, 653 and 700 | (0.43,0.37) |
| X=0.15                                                              | 265 nm               | Em <sub>base</sub> , 594, 612, 653 and 700 | (0.47,0.37) |

**Figure S1** Simulated a (black line) and experimental b (red line) powder X-ray (CuK $\alpha$ ) diffraction patterns for PbGe(PO $_4$ ) $_2$ , SrGe(PO $_4$ ) $_2$ , and PbTi(PO $_4$ ) $_2$ .

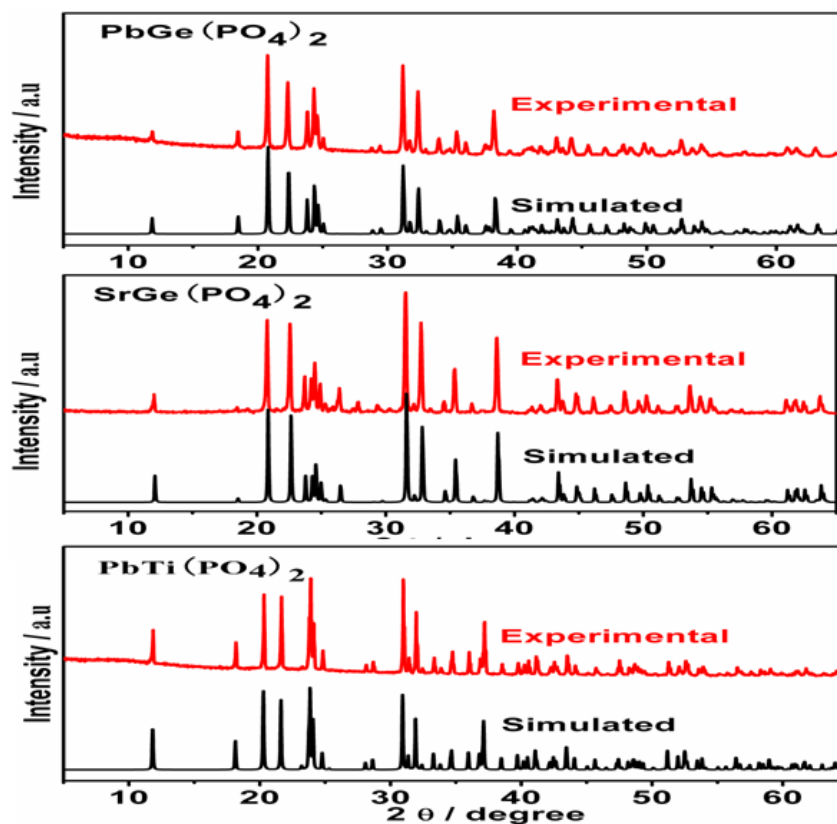

**Figure S2** The coordination of oxygen atoms around Pb $^{2+}$ . Pb, and O atoms are represented by teal and red, respectively.

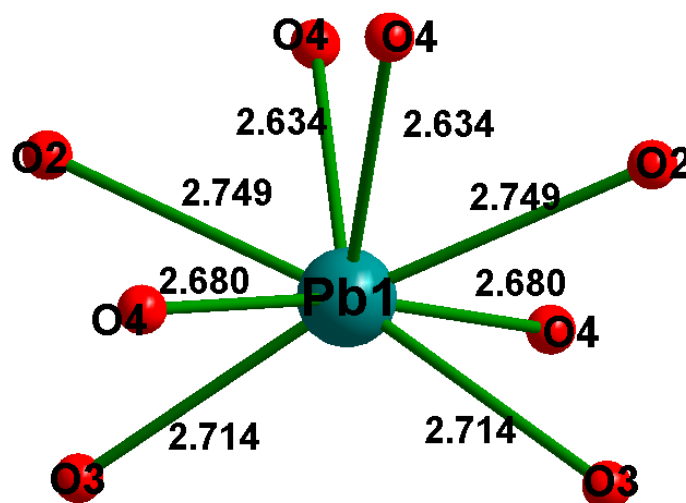

Figure S3 TGA and DTA curves for  $\text{PbGe}(\text{PO}_4)_2$  from room temperature to 1273 K

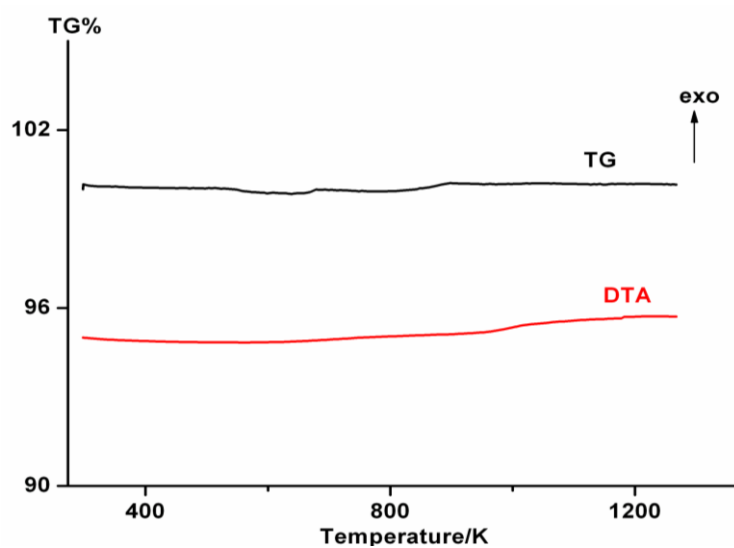

Figure S4 Optical diffuse reflectance spectra for  $\text{PbGe}(\text{PO}_4)_2$ .

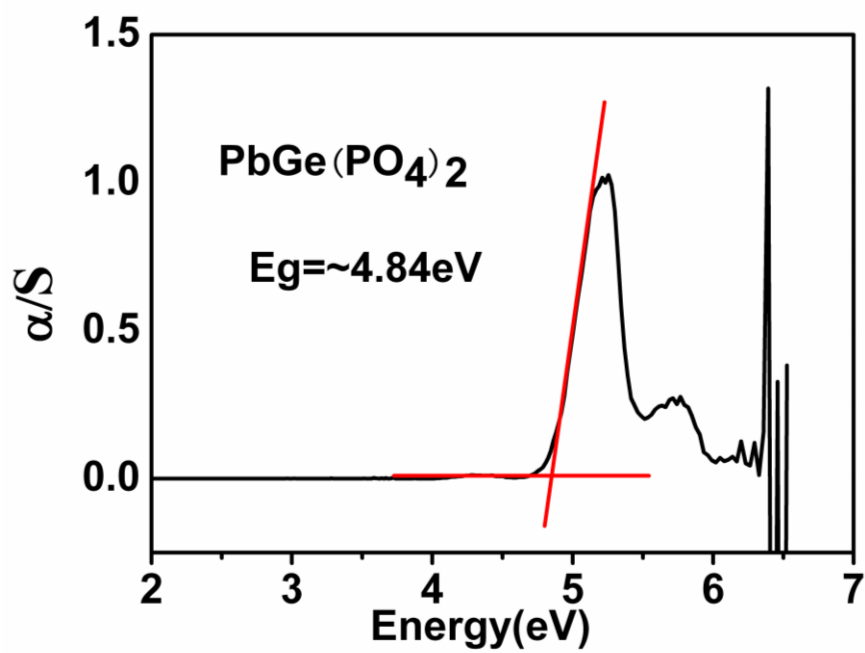

Figure S5 Powder X-ray (CuK $\alpha$ ) diffraction patterns for Pb $_{1-x}$ Eu $_x$ Ge(PO $_4$ ) $_2$

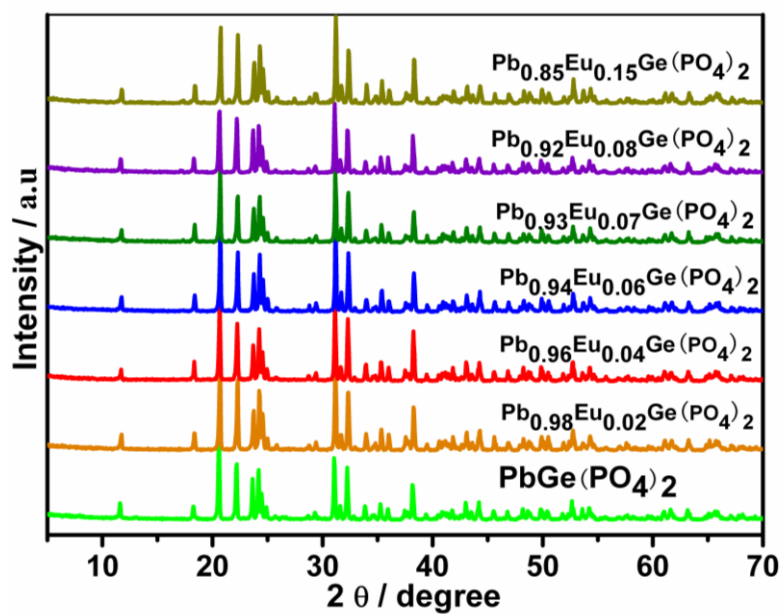

Figure S6 PL images of PbGe(PO $_4$ ) $_2$  and Pb $_{1-x}$ Eu $_x$ Ge(PO $_4$ ) $_2$  samples excited by 265nm light.

### PL Images of Pb $_{1-x}$ Eu $_x$ Ge(PO $_4$ ) $_2$

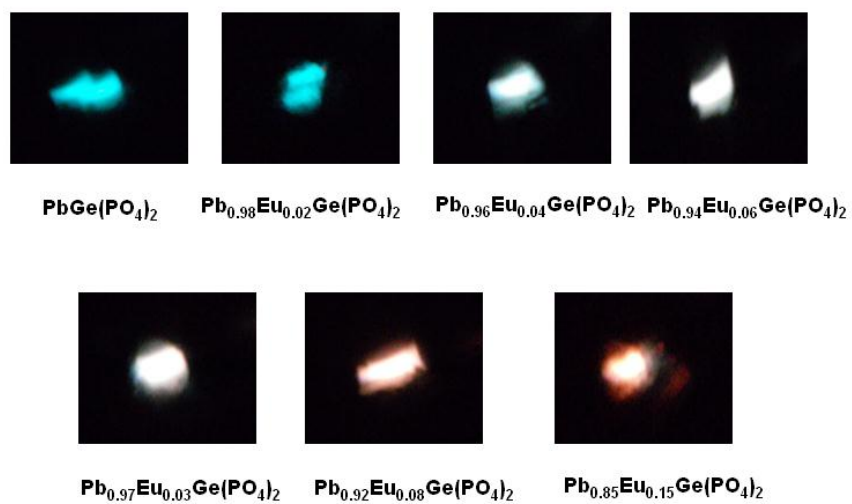

**Figure S7** The calculated band structures of  $\text{PbGe}(\text{PO}_4)_2$  crystal in the range of -2.0 and 10.0 eV. The Fermi level is set at 0 eV.

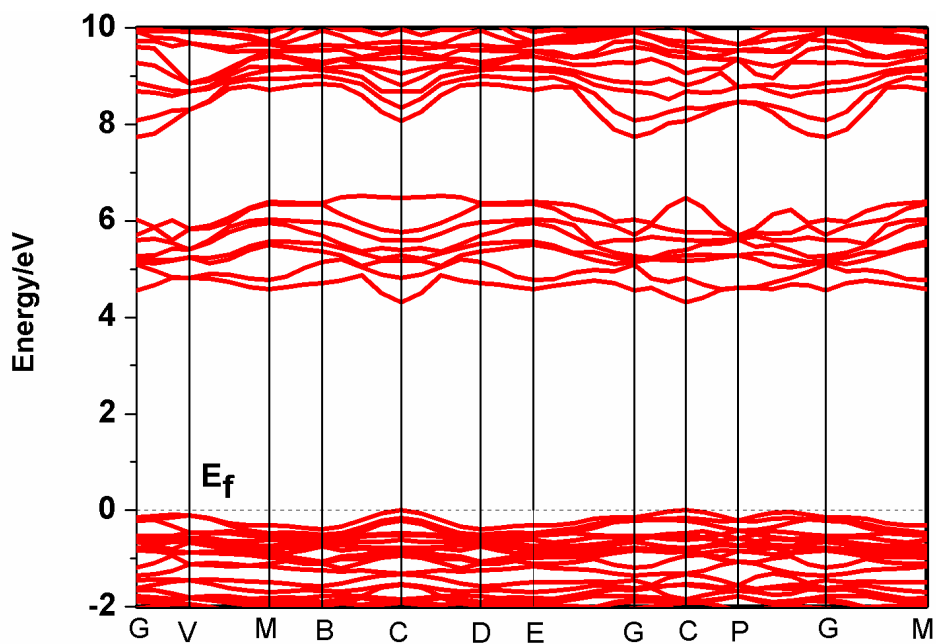

**Figure S8** PDOS of Eu in  $\text{PbGe}(\text{PO}_4)_2$  with 6.25%  $\text{Eu}^{3+}$  doping given by GGA+U. The Fermi level is set at 0 eV.

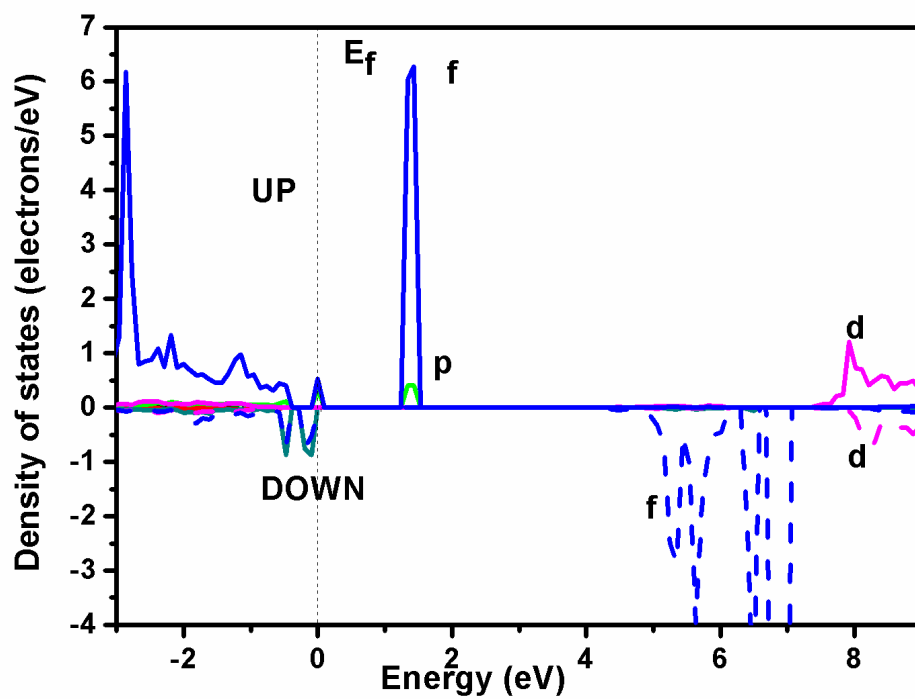

Supplement: c3ce40936h.pdf [file c3ce40936h.pdf]
